# Supplementary material for: Alpine Holocene Tree-Ring Dataset: Age-related trends in the stableisotopes of cellulose show species-specific patterns
Source: Copernicus journal article supplement (doi:10.5194/bg-2020-166), 2020-05-27
Supplement: Supplementary file 1 [file bg-2020-166-supplement.pdf]

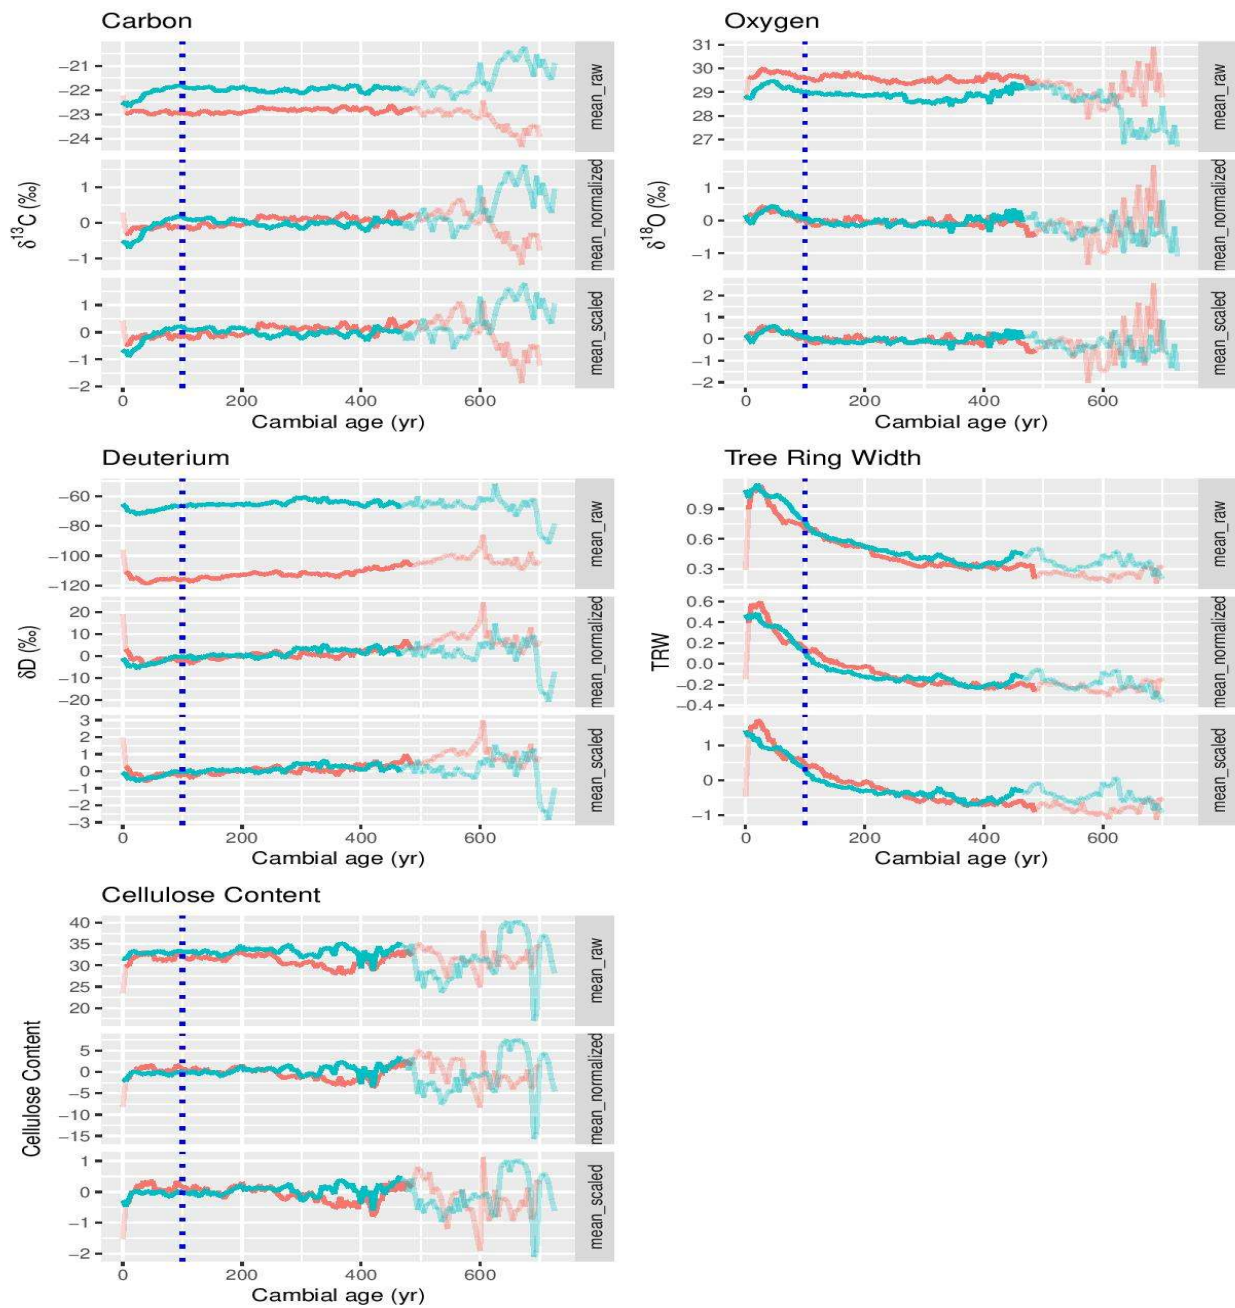

Supplement fig 1:

5 Comparison between raw, normalized and scaled (Z-score) values for each proxy. The darker lines represent replication of more or equal than 10, the paler lines with less than 10, the vertical dotted blue line indicates 100 yr
